# Supplementary material
Source: PubMed Central journal article supplement (PMC10018400)
Supplement: jamapsychiatry-e230109-s002.pdf [file jamapsychiatry-e230109-s002.pdf]

## Data Sharing Statement

Xuan. Association of Implementation of Postoverdose Outreach Programs With Subsequent Opioid Overdose Deaths Among Massachusetts Municipalities. *JAMA Psychiatry*. Published March 15, 2023. doi:10.1001/jamapsychiatry.2023.0109

### Data

**Data available:** Yes

**Data types:** Data (not involving human participants)

**How to access data:** [zxuan@bu.edu](mailto:zxuan@bu.edu)

**When available:** With publication

### Supporting Documents

**Document types:** Statistical/analytic code

**How to access documents:** [zxuan@bu.edu](mailto:zxuan@bu.edu)

**When available:** With publication

### Additional Information

**Who can access the data:** researchers whose proposed use of the data has been approved

**Types of analyses:** Research purpose

**Mechanisms of data availability:** With signed data access and use agreement
